# Supplementary material
Source: PubMed Central journal article supplement (PMC5172596)
Supplement: JZUSB17-0905-ESM.pdf [file JZUSB17-0905-ESM.pdf]

Supplementary Materials:

## Frequency and type of inheritable mutations induced by $\gamma$ rays in rice as revealed by whole genome sequencing

Shan LI, Yun-chao ZHENG, Hai-rui CUI, Hao-wei FU, Qing-yao SHU, Jian-zhong HUANG

Table S1 Verification of single base substitution (SBS) mutations in P<sub>2</sub>M<sub>2</sub> and P<sub>3</sub>M<sub>3</sub> plants

| SBSs  | Mutated gene | Mutation | Genotype <sup>1</sup> | Forward (F) and reverse (R) primer (5'→3')             | Verification in |                |
|-------|--------------|----------|-----------------------|--------------------------------------------------------|-----------------|----------------|
|       |              |          |                       |                                                        | M <sub>2</sub>  | M <sub>3</sub> |
| SBS1  | Os09g0359800 | G→A      | het                   | F:TGGCAGATATGGCAAAGG<br>R:TGCAGTAAGATGCAAAGAAGC        | F <sup>2</sup>  | — <sup>4</sup> |
| SBS2  | Os10g0158400 | G→A      | het                   | F:TCATTCATAGACGCATCGC<br>R:GCTCGCTTTTGGTTAGACC         | T <sup>3</sup>  | —              |
| SBS3  | Os12g0424300 | C→G      | het                   | F:TTCCATACTAGCACATTCCCATA<br>R:TCTTGATGTTCCCACTGATACCT | T               | —              |
| SBS4  | Os08g0155700 | A→G      | het                   | F:TGATGCTGGAAGTAGTGCCC<br>R:GGAATTTCTTACCGTACCATCATAT  | T               | —              |
| SBS5  | Os07g0572600 | C→T      | het                   | F:GCATTGGAAGGAAGGTTGTA<br>R:CCTCAGCATCCGTGGTAAA        | F               | —              |
| SBS6  | Os05g0552550 | T→C      | het                   | F:CAGTCAGCGGCGAAAAGA<br>R:GCCCATCACCAAGGAGGA           | T               | —              |
| SBS7  | Os04g0487400 | C→G      | het                   | F:ACGAACTAGCCGAACACTCCC<br>R:AAGACAAAGACCGAAACCCAGA    | F               | —              |
| SBS8  | Os02g0528900 | G→C      | het                   | F:CCAGTAGTGCCTTCATCGTT<br>R:CGTCGTTGAGAATGGGGAT        | T               | —              |
| SBS9  | Os03g0753500 | G→C      | hom                   | F:CCCAGCATTGGAGGAAGT<br>R:AGCAAGCATCAAGCACGT           | F               | —              |
| SBS10 | Os01g0656400 | A→G      | hom                   | F:GTTGTTGGCGTGTTTTGATTAGTTT<br>R:GCGTCGGCTGATGCTTTTG   | T               | —              |
| SBS11 | Os10g0380100 | G→C      | het                   | F:GGCGTTCCCGAGGATGAGA<br>R:CACGACGGCACGAAGATGA         | T               | —              |
| SBS12 | Os08g0155700 | A→G      | het                   | F:CAAGGCTCGTGATGATGC<br>R:CACAAGTCGTCGCTGGAT           | T               | —              |
| SBS13 | Os07g0598700 | C→T      | het                   | F:ATTTGTTAGCACTCCGATGG<br>R:CAGCACTGAGAATCAGACCG       | T               | —              |
| SBS14 | Os05g0552600 | G→T      | het                   | F:CCCATCACCAAGGAGGACT<br>R:TGACACGGTTACATGCTGAAC       | F               | —              |
| SBS15 | Os06g0175500 | C→G      | het                   | F:TCTGAACGAACCGAACCC<br>R:GCCGCGTCTATCTGGAAT           | T               | —              |
| SBS16 | Os04g0115650 | C→T      | het                   | F:CGATGTCGCTATGTTTGC<br>R:CCAGAAGAATGATGCCTTT          | T               | —              |
| SBS17 | Os02g0596100 | C→T      | hom                   | F:ACTGCTTGTGCCCTTCAT<br>R:CAACAGCCATTGCTAACC           | T               | T              |
| SBS18 | Os02g0610500 | G→T      | hom                   | F:GGCTGATGCGGTACAGGG<br>R:GGTTAGGCAGAAGAGGAGTAGTAGG    | T               | T              |
| SBS19 | Os03g0753500 | C→T      | het                   | F:CTTTGCCAAGAAGACTATCCCTAC<br>R:TGGTGAGATCAGCCAGAA     | T               | —              |
| SBS20 | Os01g0495200 | G→C      | het                   | F:GCAAAGTGCGGGCTATCA<br>R:AGGAGGACGAGCAAGACG           | T               | —              |

<sup>1</sup>het for heterozygous and hom for homozygous mutations; <sup>2</sup>The mutation was proved to be false (F) by Sanger sequencing;<sup>3</sup>The mutation was proved to be true (T) by Sanger sequencing or high resolution melting curve analysis; <sup>4</sup>Not tested (—)

**Table S2 Verification of insertion and deletion (Indel) mutations in the P<sub>2</sub>M<sub>2</sub> and P<sub>3</sub>M<sub>3</sub> plants**

| Indels  | Mutated gene | Mutation                     | Genotype <sup>1</sup> | Forward (F) and reverse (R) primer (5'→3')           | Verification in |                |
|---------|--------------|------------------------------|-----------------------|------------------------------------------------------|-----------------|----------------|
|         |              |                              |                       |                                                      | M <sub>2</sub>  | M <sub>3</sub> |
| Indel1  | Os03g0351400 | GGCCCAAGAG deletion          | het                   | F:GACGCCACTTCATTGACT<br>R:GCATACCTTCTGTGAGCC         | T <sup>2</sup>  | — <sup>4</sup> |
| Indel2  | Os05g0585500 | AT deletion                  | het                   | F:TTATTATGTTATGGCTAGGTCG<br>R:TTATGGAATCGGTTTTATCG   | F <sup>3</sup>  | —              |
| Indel3  | Os02g0218700 | TGATGGT insertion            | het                   | F:GGATGCCGCTGGTGAAGT<br>R:CGTGCGTGCTATCCCGAC         | F               | —              |
| Indel4  | Os10g0142100 | TATGTATGTA deletion          | het                   | F:TGATGTTATGCGGTAAGTGG<br>R:TTTCAAAAGCGTGATGCC       | T               | —              |
| Indel5  | Os04g0218600 | GGTAGCGGAGGAGGAGGC insertion | het                   | F:GAGGGAGGCATCGTCGGA<br>R:CGTAGCGCAAGGGGTGT          | T               | —              |
| Indel6  | Os04g0298600 | G deletion                   | hom                   | F:GTTGATGGAAGATGGACCCTT<br>R:TTGCTCGTCCGAGATGGC      | T               | —              |
| Indel7  | Os04g0534100 | A deletion                   | hom                   | F:CCAGACACTTATGCCTTATCC<br>R:AACGAGCAGACGAGACCA      | T               | —              |
| Indel8  | Os04g0588200 | T deletion                   | hom                   | F:CCGTATCGAACCGCCTAGC<br>R:CCAAGTCACAACCTCCCCAC      | T               | —              |
| Indel9  | Os04g0643200 | C insertion                  | hom                   | F:GATTTACAGCTACTTTTGGGTTT<br>R:ATTCCGGTTGGCATTTC     | T               | —              |
| Indel10 | Os04g0389600 | T deletion                   | hom                   | F:TCCAGGTAAAAGTAAACGAGCAT<br>R:CGGTGGTTGGTGGTGTATGT  | T               | —              |
| Indel11 | Os01g0715201 | TCT insertion                | het                   | F:CCTGCCAGTGCACGGTAT<br>R:GGCGTGTCTCTTATGGTAAA       | T               | —              |
| Indel12 | Os12g0246700 | AGTAGGGTA insertion          | het                   | F:CCGAATAGAAAAGAAGAATG<br>R:TAGTGGTGGTGAAGTCCTG      | F               | —              |
| Indel13 | Os02g0528900 | TACTATA insertion            | het                   | F:ATGGGACTTGACATTTGC<br>R:TTCCAAGATGATGTTTCG         | F               | —              |
| Indel14 | Os03g0755100 | TCTGT insertion              | het                   | F:CCATATTACATAGCAGCCAATC<br>R:TCCTCCACTCCCTCCATT     | F               | —              |
| Indel15 | Os08g0155700 | ACACAGCGTT insertion         | het                   | F:TGGACTTTCTTATCCCTCAAT<br>R:GTGGGTCTGGTACGGTCA      | F               | —              |
| Indel16 | Os01g0964133 | AG deletion                  | het                   | F:TTAGGGTGATGTGGGTAA<br>R:CATGGGTGCCTGTAGTG          | T               | —              |
| Indel17 | Os04g0282400 | C insertion                  | hom                   | F:ACATACCTCGAACTCTTCCC<br>R:GACGACGTACCAGCTAACAC     | T               | —              |
| Indel18 | Os04g0298600 | G deletion                   | hom                   | F:GTTGATGGAAGATGGACCCTT<br>R:TTGCTCGTCCGAGATGGC      | T               | —              |
| Indel19 | Os04g0534100 | C deletion                   | hom                   | F:CCAGACACTTATGCCTTATCC<br>R:AACGAGCAGACGAGACCA      | T               | —              |
| Indel20 | Os07g0569166 | T insertion                  | het                   | F:ATGGAGCGATGGGTAAT<br>R:CGATGTAGAAAACGTGCTAGTAAAA   | T               | —              |
| Indel21 | Os10g0492400 | G deletion                   | hom                   | F: TTCAGGATAGCGAGGTGGAGCG<br>R:GCGAGCGAAGTGAGTGGGTTT | T               | —              |
| Indel22 | Os12g0110700 | TC deletion                  | het                   | F:GCATCCTTCTAATCGTGCCC<br>R:GGTGGTTTTGACCCAGTTTT     | F               | —              |
| Indel23 | Os01g0244400 | GA deletion                  | het                   | F:ACAAAACGTGAGCACCAAACCTGA<br>R:CCTGGCTGGCGCATAGGA   | T               | —              |
| Indel24 | Os07g0620600 | AG deletion                  | het                   | F:AACGTGAGGGAGGAGGACT<br>R:CCCCAACAAAACCAAAT         | F               | —              |
| Indel25 | Os06g0269151 | AAG deletion                 | het                   | F:ACAGGTGATGTGCAAGCG<br>R:CAAATTCAGGTTCTCCGTC        | F               | —              |
| Indel26 | Os05g0202500 | A insertion                  | het                   | F:TCGGTCTGTCTAAGATAA<br>R:CAGGGAGGTGTAGGTAGG         | T               | —              |
| Indel27 | Os09g0375100 | T insertion                  | het                   | F:GGAGGGCAGGAGAATCAT<br>R:GGTTCCAACGCTAAAGGT         | T               | —              |
| Indel28 | Os08g0355400 | T insertion                  | het                   | F:GTTGACACGGGAACCTCA<br>R:CGGAGGATTATGGTGCTG         | F               | —              |
| Indel29 | Os09g0471500 | A insertion                  | hom                   | F:GCTGCTACGTTCTCTGC<br>R:GATTGGATTGACTGGCTTAC        | F               | —              |
| Indel30 | Os02g0528550 | T insertion                  | het                   | F:CAAGGTTACAAGGAGCGAAAAG                             | F               | —              |

|         |              |                                   |     |                                                      |                |   |
|---------|--------------|-----------------------------------|-----|------------------------------------------------------|----------------|---|
|         |              |                                   |     | R:CGCACGCATGACAATAGC                                 |                |   |
| Indel31 | Os06g0286351 | TGTTTCTTTGCCTGCAC deletion        | hom | F:ATAGATGAAAGCGAGGAT<br>R:GTACCACCACTTTAAGAAC        | T <sup>2</sup> | T |
| Indel32 | Os12g0208900 | A deletion                        | hom | F:TCCTCAAGGTCTGGATGC<br>R:ATGAACAGTGGGGAGTGAA        | T              | — |
| Indel33 | Os05g0147133 | GAGCAT deletion                   | het | F:TGGTGCCACTTTGGGTAG<br>R:AAAGCACGGAGCATACT          | T              | — |
| Indel34 | Os12g0611300 | A deletion                        | hom | F:GGACCAGGTGATGCTCTGC<br>R:AGTCGAAGCTGCCGCTCT        | T              | — |
| Indel35 | Os04g0385700 | GC insertion                      | hom | F:TATTTCCCTTTCCAATGTTC<br>R:GAATCGTCGTTGACTGC        | T              | — |
| Indel36 | Os04g0385700 | T deletion                        | hom | F:GAGGACCTCCATGTGCTTG<br>R:CCACTAGACTTTGTCACCGACT    | T              | T |
| Indel37 | Os04g0387300 | C insertion                       | hom | F:GTAGGAAGCCAATCGAACT<br>R:TCAAGGGGAAAAGAGCGTA       | T              | T |
| Indel38 | Os04g0599100 | G deletion                        | hom | F:GAAGCGGGCTGAGTTGAA<br>R:AAGCGATTGTGAAGGGACA        | T              | — |
| Indel39 | Os04g0687150 | C deletion                        | hom | F:AAGCAAGAGGCAATTAGAGCG<br>R:TGCAGGTGAGGGAGTGAGC     | T              | T |
| Indel40 | Os04g0349600 | T deletion                        | hom | F:CTGTTGACGAATCCCTACTG<br>R:CACATTTCCTTTGTCTGC       | T              | T |
| Indel41 | Os04g0321800 | C insertion                       | hom | F:TTTTGCCTCTGTTCTCTTC<br>R:CTGGTTGACGCCCTTGTT        | T              | — |
| Indel42 | Os02g0207900 | AG insertion                      | het | F:GGAGGAAGAAGGTTTAG<br>R:CAAAGTGGCACTTAATC           | T              | — |
| Indel43 | Os02g0528550 | G insertion                       | het | F:TCTAGGGCAAATGAAGGC<br>R:TCAGACCGAACTGGCAAC         | F              | — |
| Indel44 | Os04g0218400 | CTA insertion                     | het | F:CAAGGTGGTACTCAACA<br>R:CTGCTCTTCGTATGGTGC          | F              | — |
| Indel45 | Os08g0313600 | A insertion                       | het | F:CTGCTTCACTTGCCTTGT<br>R:TTGGCTAATGTGGTTTCT         | T              | — |
| Indel46 | Os04g0317800 | CGCGATACACGCCGGTCT AACCG deletion | het | F:ATTGGCAAAGTTAATCGC<br>R:GAGGCATCAAGTCACCTACA       | T              | — |
| Indel47 | Os01g0104800 | AA deletion                       | het | F:AGTGGGATTATGGGAGTG<br>R:GGTAGTGATGGTTGGGTG         | T              | — |
| Indel48 | Os04g0312500 | C insertion                       | hom | F:CTTGCTTCAACCAGACCCTT<br>R:CCCACAGCCGAATACCAG       | T              | — |
| Indel49 | Os04g0301700 | G insertion                       | hom | F:ATGGGACGAATAGAGTAAATGCC<br>R:CGTCGAGGTGGAGCAGGTAG  | T              | — |
| Indel50 | Os04g0352700 | G insertion                       | hom | F:TACTCATCCTCGCTCTGGC<br>R:GGGCTGGTTGTCGCTCAT        | T              | — |
| Indel51 | Os09g0369500 | TC deletion                       | het | F:AAGAAGCTGGGCAACACGG<br>R:CTGAAGAGTTAGGCACCAAACATAC | F              | — |
| Indel52 | Os02g0132500 | GCG deletion                      | het | F:ATGCTGTGCAACAGGGAGT<br>R:GGGGAGGATCTGAAGAGGT       | F              | — |
| Indel53 | Os07g0201800 | TCT deletion                      | het | F:CAGGCTGCTGTGATGCT<br>R:TGGAGACGAAGGTGACGG          | T              | — |
| Indel54 | Os04g0298600 | G deletion                        | hom | F:ATCCGTCCTTCTACAGTTCC<br>R:ACAGAGCGTGACCGACTT       | T              | — |
| Indel55 | Os04g0675101 | CT deletion                       | het | F:ATCGGCAAAGGAGAAGTC<br>R:AGCAGATGATGCAGCACA         | T              | — |
| Indel56 | Os10g0211900 | G insertion                       | het | F:GAATGGACGGAACCCTAA<br>R:GAAAGCGACACCCACTAAC        | T              | — |
| Indel57 | Os05g0549700 | CCC insertion                     | het | F:GACTACGAATCCGAGGCT<br>R:GAAGGGTTTGGTTGAGGG         | F              | — |
| Indel58 | Os08g0355400 | TT insertion                      | het | F:AGGACAAGAGCCTAACGA<br>R:CTCACTCCATCCCATTTT         | F              | — |
| Indel59 | Os04g0312500 | C insertion                       | hom | F:CTTGCTTCAACCAGACCCTT<br>R:CCCACAGCCGAATACCAG       | F              | — |
| Indel60 | Os04g0321800 | C insertion                       | hom | F:TTTTGCCTCTGTTCTCTTC<br>R:CTGGTTGACGCCCTTGTT        | T              | — |

<sup>1</sup>het for heterozygous and hom for homozygous mutations; <sup>2</sup>The mutation was proved to be false (F) by Sanger sequencing; <sup>3</sup> The mutation was proved to be true (T) by Sanger sequencing or high resolution melting curve analysis; <sup>4</sup>Not tested (—)

**Table S3 Verification of structural variation (SV) mutations in P<sub>2</sub>M<sub>2</sub> plants**

| SVs  | Chromosome | Location          | Mutations        | Forward (F) and reverse (R) primer (5'→3')       | Size (WT/MT, bp) <sup>1</sup> | Verification   |
|------|------------|-------------------|------------------|--------------------------------------------------|-------------------------------|----------------|
| SV1  | 6          | 28795143-28795784 | 184 bp deletion  | F:ATGTGAGGGAAGCTGAAAGA<br>R:GAGTGCATCGACCATAACT  | 846/662                       | F <sup>2</sup> |
| SV2  | 10         | 14899128-14899888 | 229 bp deletion  | F:CCGAGGTGTTTCGACGTAAT<br>R:CCTGCCTGCCTTGTAGAGT  | 1247/1018                     | F              |
| SV3  | 9          | 3858255-3858530   | 230 bp deletion  | F:CAGAGCAGTGAGGCATTT<br>R:TTGGCATAGCCCTACAGA     | 528/298                       | F              |
| SV4  | 9          | 6249647-6249776   | 201 bp insertion | F:CAAATCAAAGGCTAATCCA<br>R:ACTTACAACAAGCACCAC    | 603/804                       | F              |
| SV5  | 12         | 24668763-24669908 | 767 bp inversion | F:AAGTTTGTACCCTGAAGC<br>R:GAAAGGCAAGAGTTGGAAT    | 1455/1455                     | F              |
| SV6  | 9          | 3868727-3868907   | 218 bp deletion  | F:CAGAAGCGTCTCAGCATA<br>R:CGAAGTGTCGGAGGATTT     | 870/652                       | F              |
| SV7  | 8          | 1718198-1718606   | 238 bp deletion  | F:ATTCTTCCCTCATTCTGC<br>R:CAATCACTCGACAACCC      | 720/482                       | T <sup>3</sup> |
| SV8  | 2          | 28699544-28700165 | 195 bp insertion | F:TTACTTTGTCCGATTGGCC<br>R:GATGGGTTGCTGTCTTCTG   | 1355/1550                     | F              |
| SV9  | 9          | 6374464-6375052   | 194 bp insertion | F:GCACGACATCGTTCCTG<br>R:GTCATCAACACGGCACAT      | 863/1057                      | F              |
| SV10 | 6          | 1192705-1192933   | 154 bp inversion | F:TTGGTCCCCTGATGGCGAACT<br>R:CCACCGGCGTGAGCGAAAA | 547/547                       | F              |

<sup>1</sup>The expected fragment size for the wild type (WT) and mutant (MT) plant; <sup>2</sup>The mutation was proved to be false (F); <sup>3</sup> The mutation was proved to be true (T)

**Table S4 Verification of copy number variation (CNV) mutations in P<sub>2</sub>M<sub>2</sub> plants**

| CNVs | Chromosome | Location          | Mutations           | Forward (F) and reverse (R) primer (5'→3')         | Verification   |
|------|------------|-------------------|---------------------|----------------------------------------------------|----------------|
| CNV1 | 12         | 21206601-21207300 | 700 bp deletion     | F:ACCTCCCGAGAAGCGAAGA<br>R:CGAAATCGAAACAACCTTGAGAA | T <sup>1</sup> |
| CNV2 | 11         | 19082501-19083300 | 800 bp deletion     | F:CAGACCTGTGGGTTTGGC<br>R:TGCTCTTCTCCTACCTTCC      | F <sup>2</sup> |
| CNV3 | 7          | 5271901-5272700   | 800 bp deletion     | F:GTCGTGAGGGTTACAAGC<br>R:CAAGTAGGAACGGGTGGT       | T              |
| CNV4 | 6          | 21377101-21377700 | 600 bp deletion     | F:CAAGTCAGAAAGACGAGCAG<br>R:TGGGCAAAGGATACATTACA   | F              |
| CNV5 | 4          | 28745901-28749500 | 3600 bp duplication | F:TTCCTGACTTCTGAGCC<br>R:CAAAGCCTTTATGCCAAC        | F              |
| CNV6 | 2          | 15740801-15743500 | 2700 bp duplication | F:TTTCAGAATAAATGGGAGATAGGG<br>R:CCGTGCTGGTAAAGTGCC | F              |
| CNV7 | 1          | 24753201-24754100 | 900 bp deletion     | F:GTGCTCGACGCTGGACAGT<br>R:GCCCGAAGAAAGAAGTAACAAA  | F              |

<sup>1</sup>The mutation was proved to be true (T); <sup>2</sup>The mutation was proved to be false (F)

**Table S5 Frequency of single base substitution (SBS) and Indel mutations in individual chromosomes of the six  $\gamma$  rays-mutagenized  $P_2M_2$  plants (mutation numbers per million base pairs)**

| Chromosome | 165-MS |       | 165-NP |       | 246-MS |       | 246-NP |       | 389-MS |       | 389-NP |       |
|------------|--------|-------|--------|-------|--------|-------|--------|-------|--------|-------|--------|-------|
|            | SBS    | Indel |
| 1          | 5.55   | 2.10  | 9.43   | 2.59  | 5.87   | 2.73  | 8.16   | 2.54  | 5.04   | 2.15  | 4.83   | 1.99  |
| 2          | 6.73   | 2.25  | 7.99   | 2.28  | 8.10   | 2.45  | 7.76   | 2.20  | 4.73   | 2.20  | 5.04   | 2.64  |
| 3          | 6.73   | 2.17  | 8.60   | 2.53  | 7.99   | 2.00  | 6.43   | 2.77  | 5.36   | 2.66  | 4.83   | 2.97  |
| 4          | 14.17  | 2.37  | 18.28  | 2.51  | 14.17  | 2.87  | 17.58  | 2.23  | 12.76  | 3.01  | 14.34  | 2.93  |
| 5          | 9.18   | 1.94  | 10.25  | 1.57  | 9.45   | 2.04  | 9.11   | 2.14  | 5.27   | 1.77  | 6.38   | 1.77  |
| 6          | 10.43  | 1.66  | 9.25   | 1.79  | 10.78  | 1.89  | 9.89   | 2.02  | 6.27   | 1.50  | 6.08   | 1.73  |
| 7          | 6.87   | 2.02  | 6.84   | 1.85  | 6.36   | 1.72  | 6.33   | 1.95  | 4.51   | 2.02  | 3.13   | 2.09  |
| 8          | 8.82   | 1.44  | 9.84   | 2.21  | 7.98   | 1.86  | 9.84   | 1.65  | 5.87   | 1.97  | 6.01   | 1.79  |
| 9          | 8.04   | 2.04  | 9.56   | 1.39  | 7.43   | 1.65  | 11.95  | 1.83  | 3.82   | 2.17  | 6.34   | 2.39  |
| 10         | 10.56  | 2.28  | 14.61  | 2.50  | 12.75  | 1.77  | 13.40  | 1.81  | 9.61   | 1.98  | 9.18   | 1.94  |
| 11         | 8.20   | 1.62  | 8.20   | 1.03  | 8.65   | 1.34  | 9.20   | 1.45  | 5.41   | 1.55  | 7.03   | 1.69  |
| 12         | 11.01  | 2.14  | 13.87  | 2.43  | 12.46  | 1.78  | 18.31  | 2.40  | 6.90   | 1.93  | 7.59   | 2.62  |
| Average    | 8.86   | 2.00  | 10.56  | 2.06  | 9.33   | 2.01  | 10.44  | 2.08  | 6.30   | 2.08  | 6.73   | 2.21  |

<sup>a</sup>Nipponbare<sup>a</sup> (RGAP 7) as reference genome

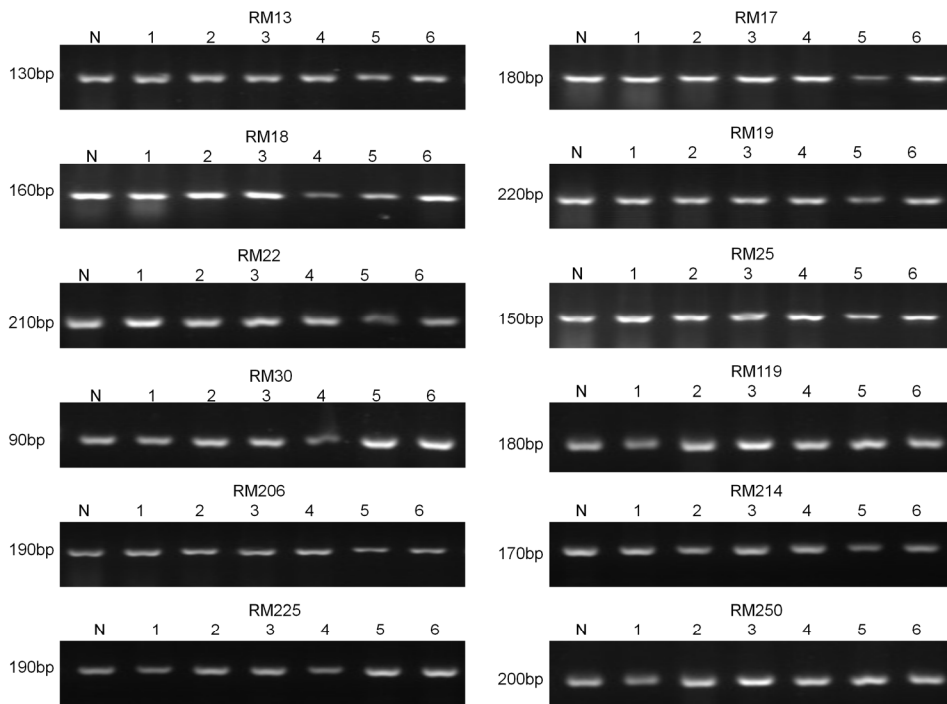**Fig. S1 Genotyping of the selected six  $P_2M_2$  plants and Nipponbare with 12 representative SSR markers**

N stands for Nipponbare; Lanes 1–6 represent 165-MS, 165-NP, 246-MS, 246-NP, 389-MS and 389-NP plants, respectively
